# Supplementary material
Source: PubMed Central journal article supplement (PMC3796620)

**Appendix 1 (as supplied by the authors): Reverse cumulative distribution curves for hSBA titres at baseline and following the first dose of vaccine**

**A**

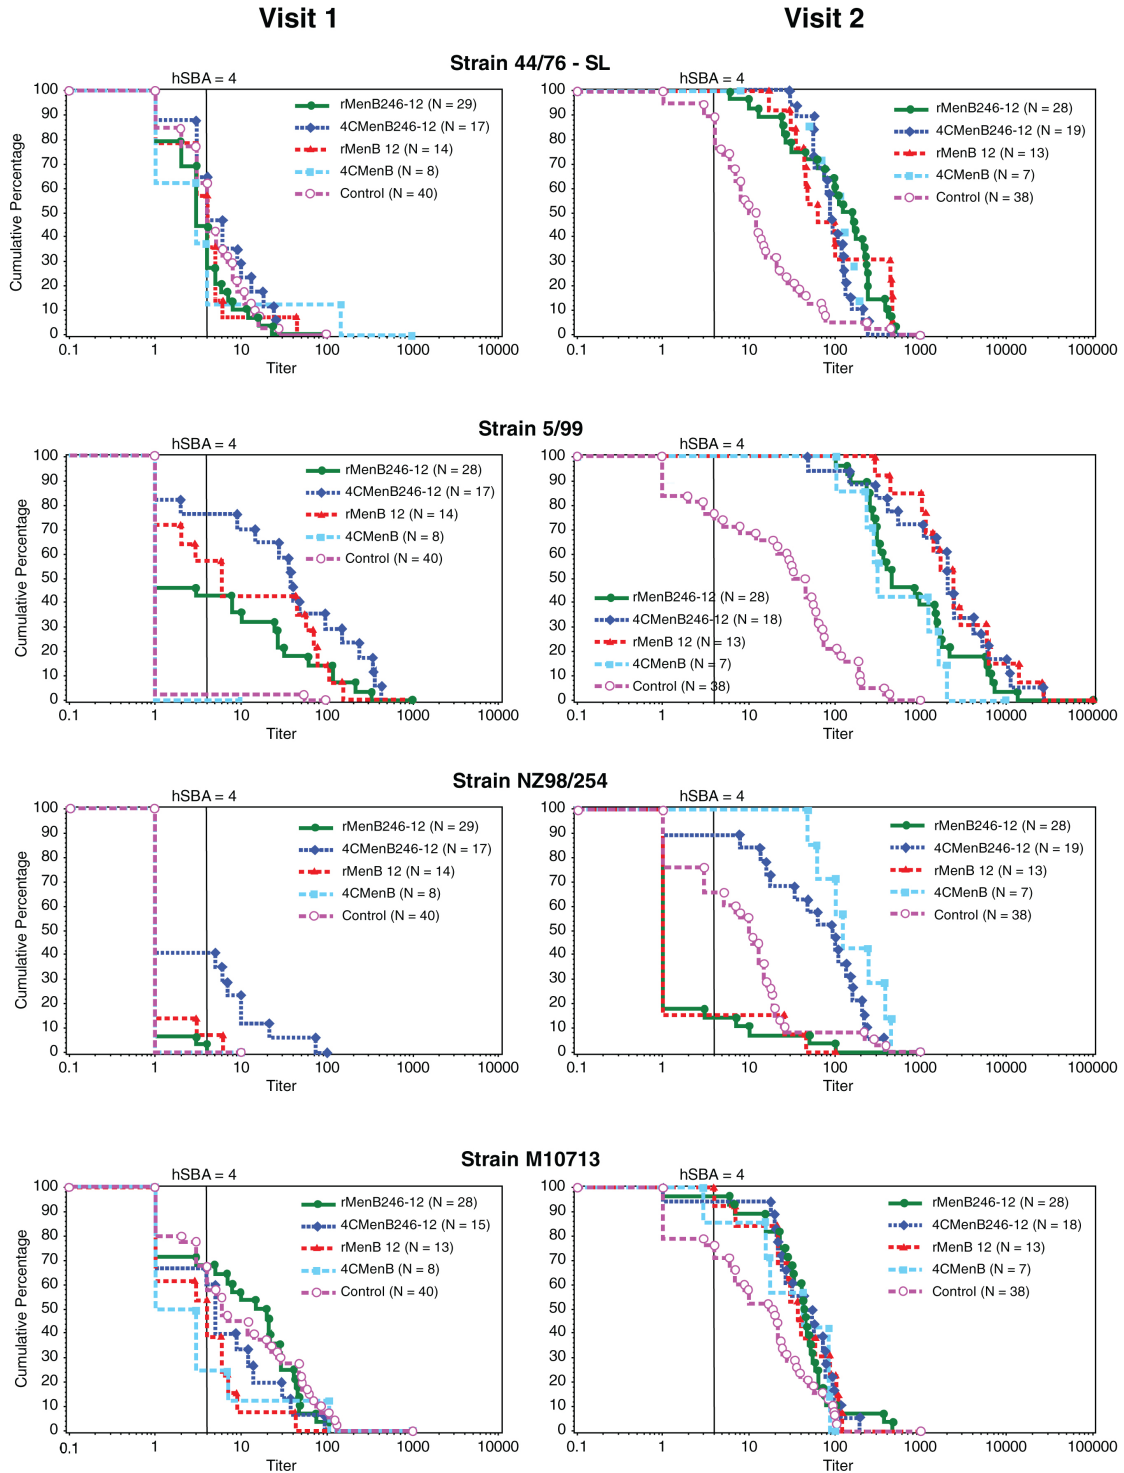

**B**

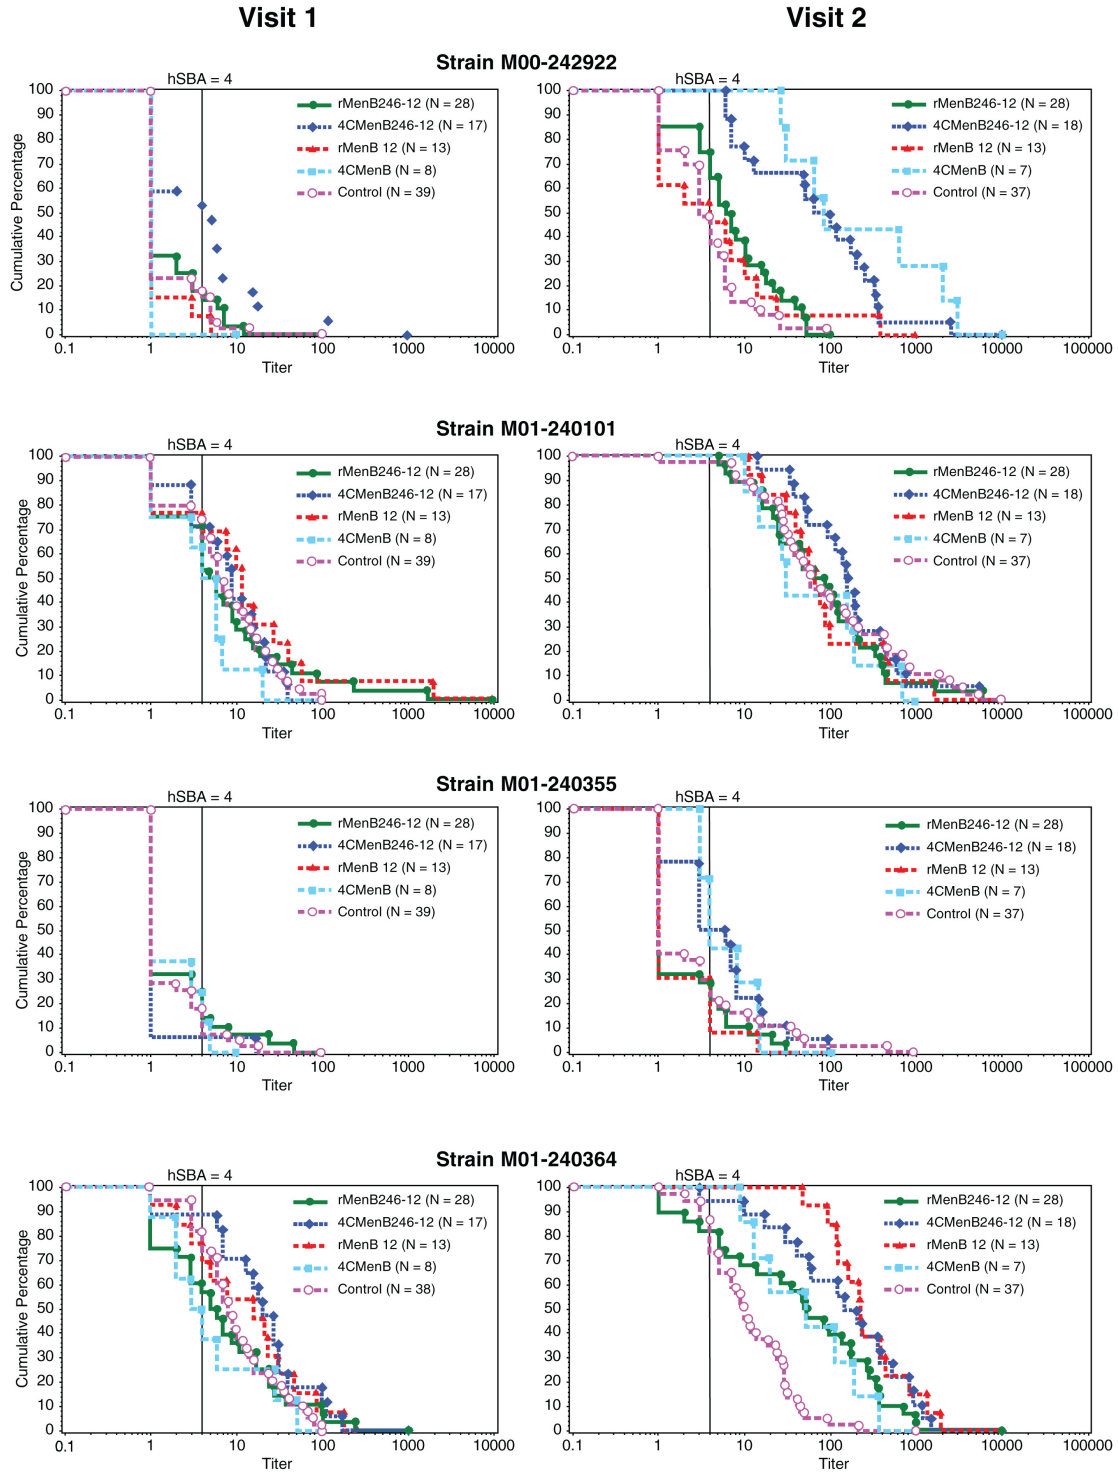

Supplement: supp_130257_bacter-snape-1-at.pdf [file supp_130257_bacter-snape-1-at.pdf]
