# Supplementary material
Source: PubMed Central journal article supplement (PMC3796620)

**Appendix 2 (as supplied by the authors): hSBA geometric mean titres for all visits in the original study and follow-up study**

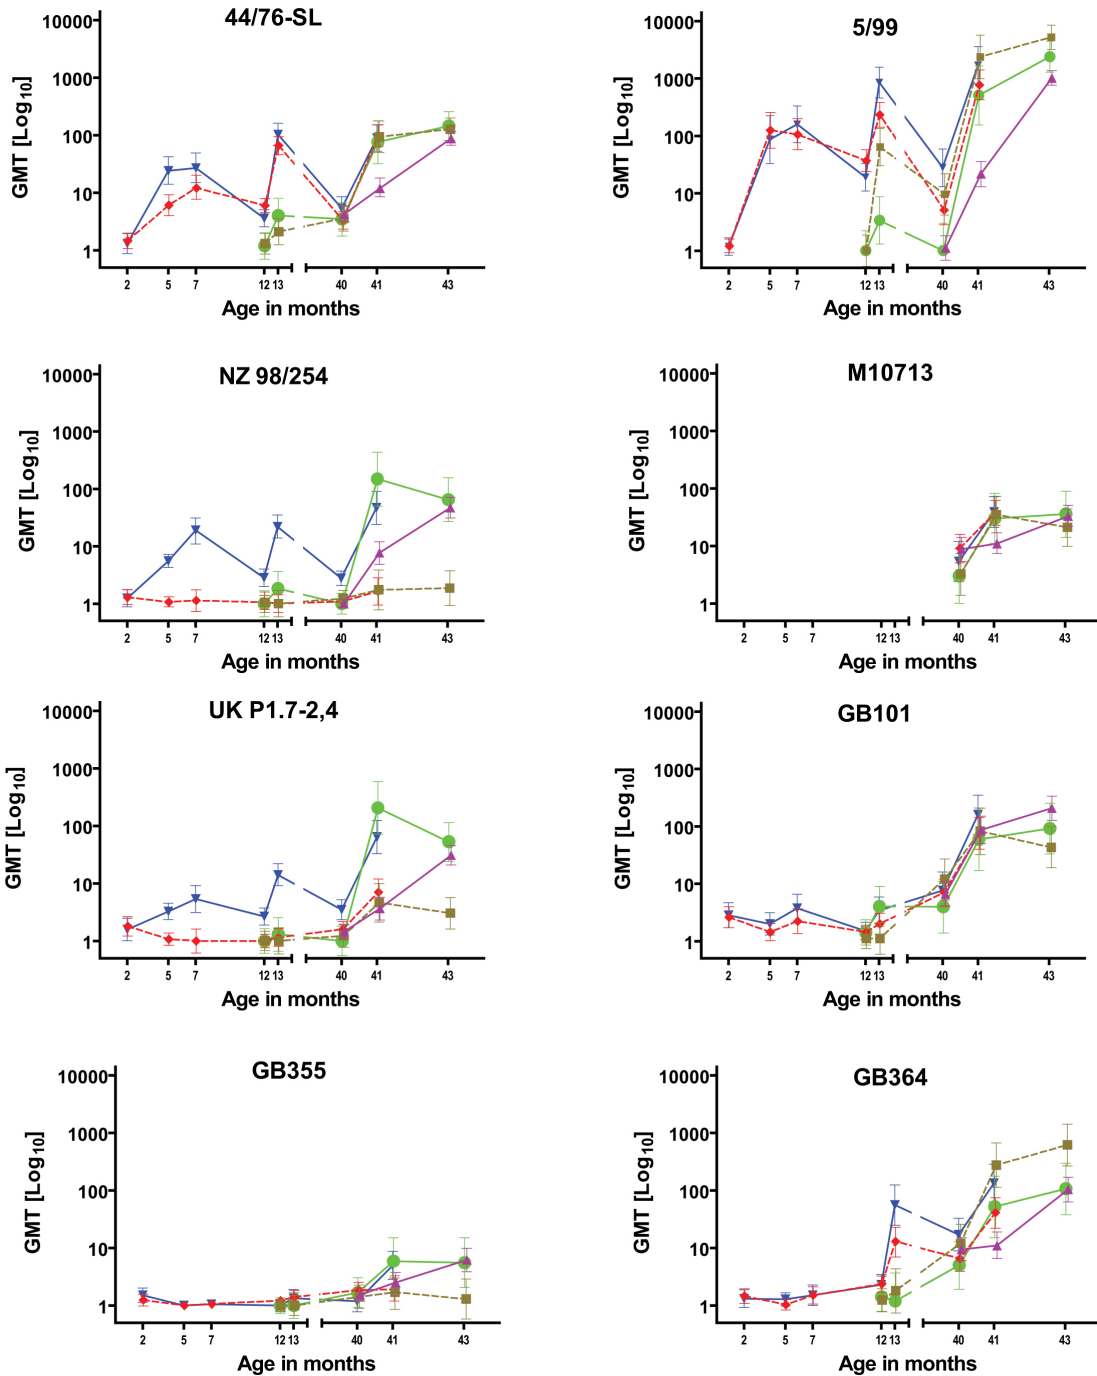

Supplement: supp_130257_bacter-snape-2-at.pdf [file supp_130257_bacter-snape-2-at.pdf]
