# Supplementary material
Source: PubMed Central journal article supplement (PMC3796620)
Supplement: supp_130257_bacter-snape-3-at.pdf [file supp_130257_bacter-snape-3-at.pdf]

Appendix 3 (as supplied by the authors): Local reactogenicity following administration of 4CMenB (3a) and rMenB (3b). *N* represents the number of participants who received the vaccine and provided reactogenicity data

Supplementary Figure 3 a

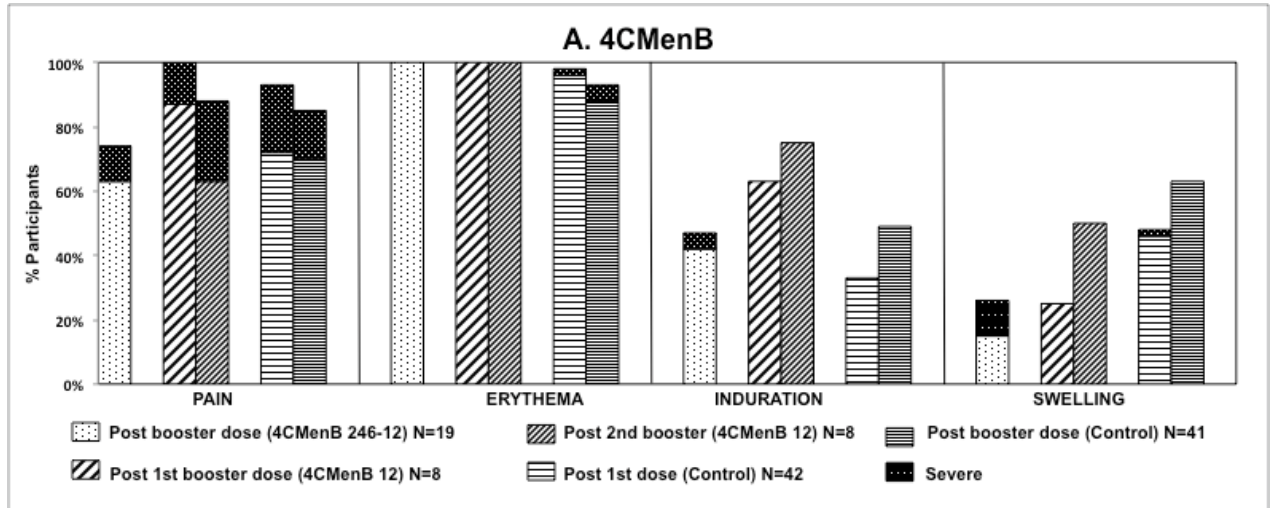

Supplementary Figure 3 b

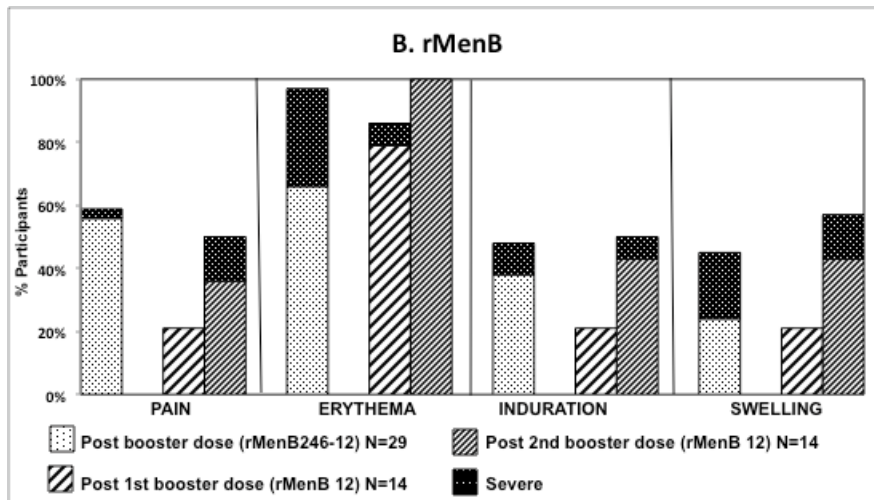

Supplementary Figure 1: Local reactogenicity following administration of 4CMenB (1a) and rMenB (1b).

*N* represents the number of participants who received the vaccine and provided reactogenicity data.
