# Supplementary material
Source: PubMed Central journal article supplement (PMC3796620)

Appendix 4 (as supplied by the authors): Systemic reactivity of 4CMenB (4a) and rMenB (4b). *N* represents the number of participants who received the vaccine and provided reactivity data. Fever is defined as temperature  $\geq 38^{\circ}\text{C}$  and graded as severe when  $>39.5^{\circ}\text{C}$ .

Supplementary Figure 4a

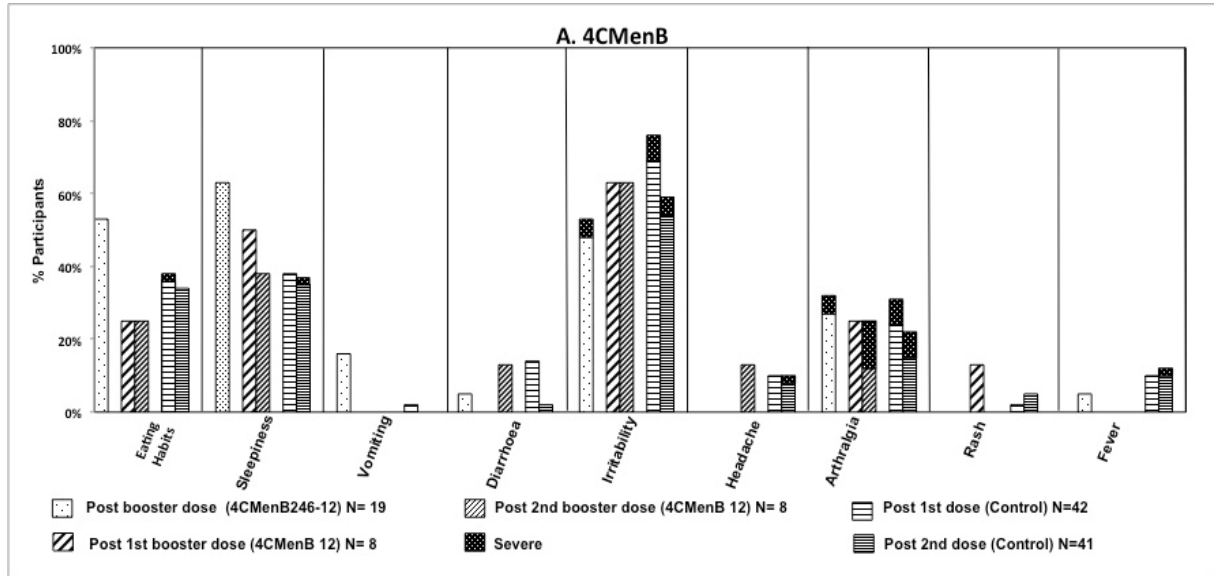

Supplementary Figure 4 b

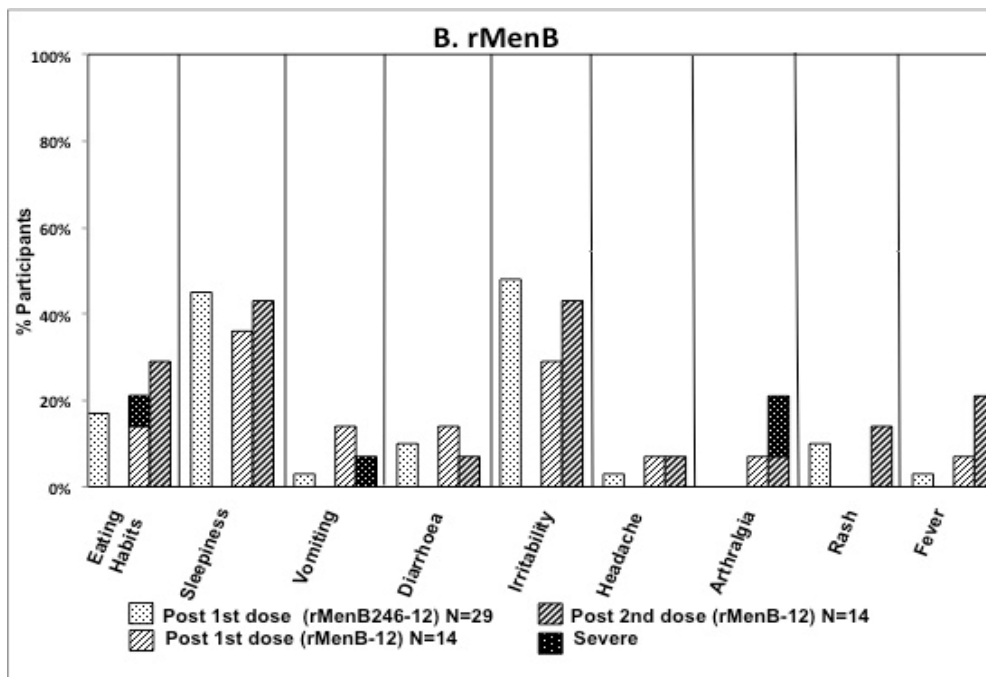

Supplement: supp_130257_bacter-snape-4-at.pdf [file supp_130257_bacter-snape-4-at.pdf]
